# Supplementary material
Source: PubMed Central journal article supplement (PMC5630686)
Supplement: cr201795x1.pdf [file cr201795x1.pdf]

# **Supplementary Information**

## **Figures**

# Figure S1

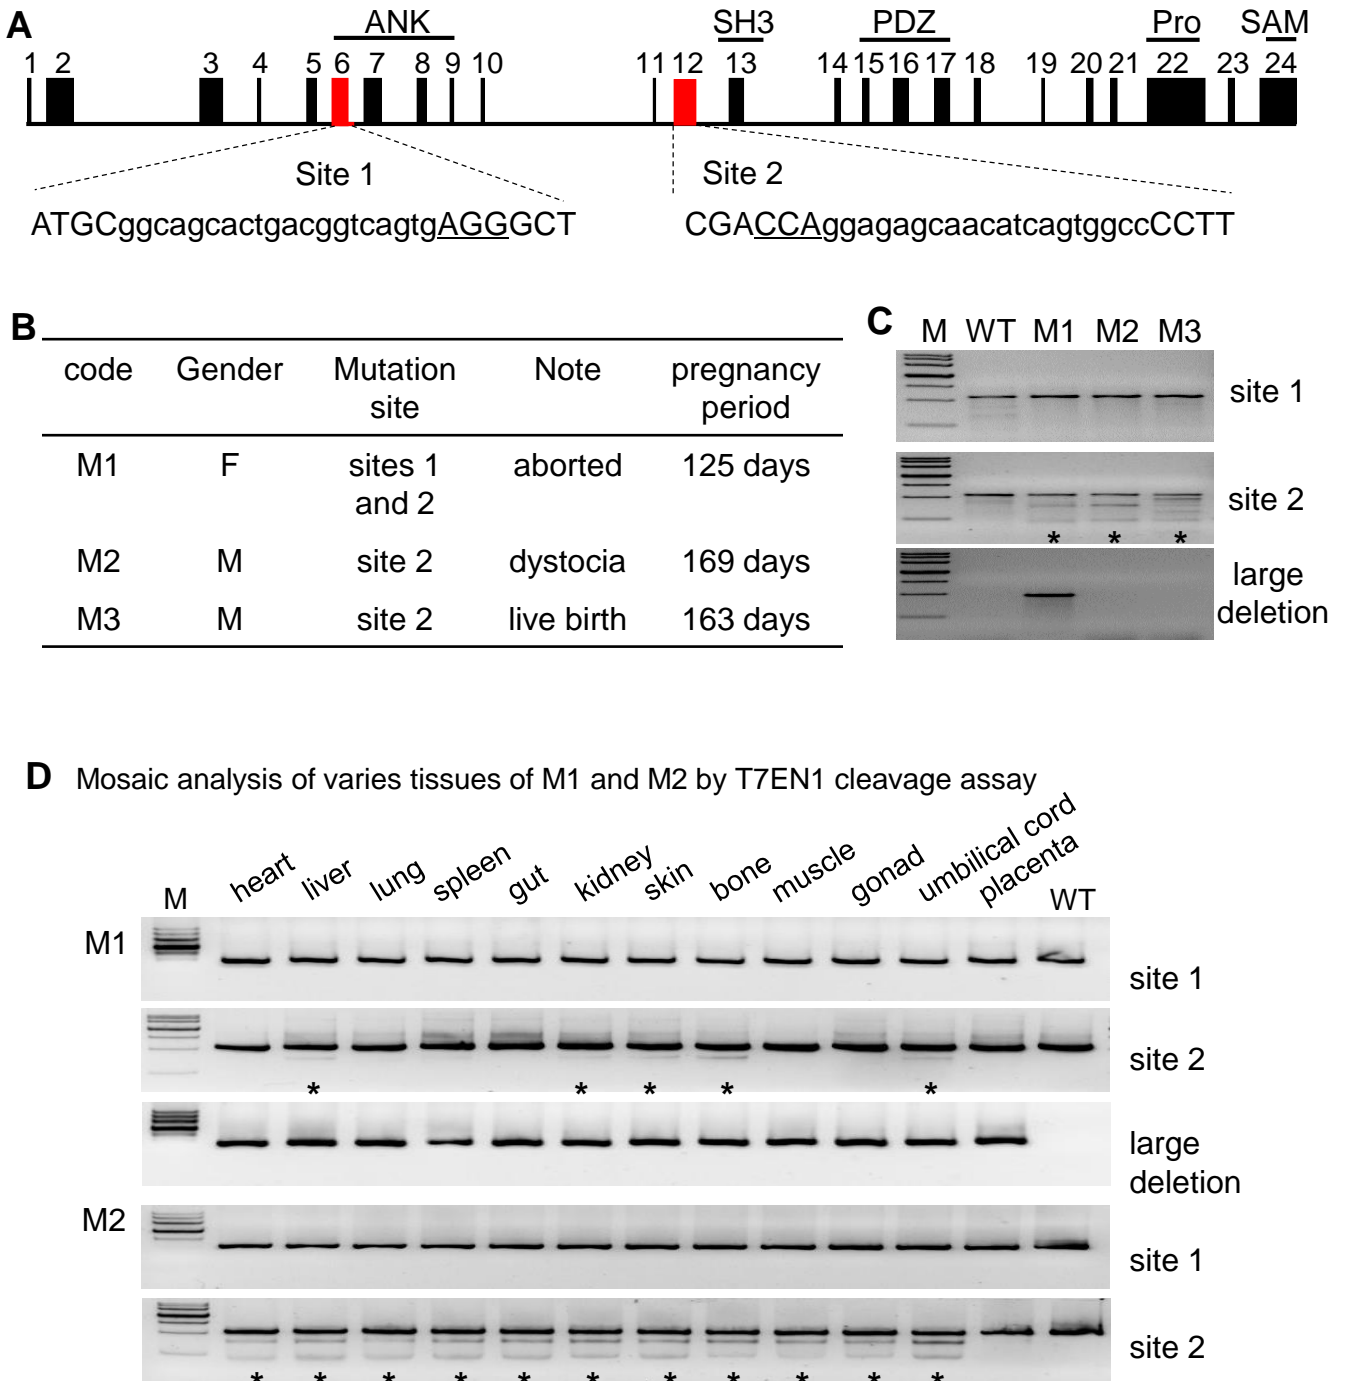



## Figure S1-continued

### G Off target analysis

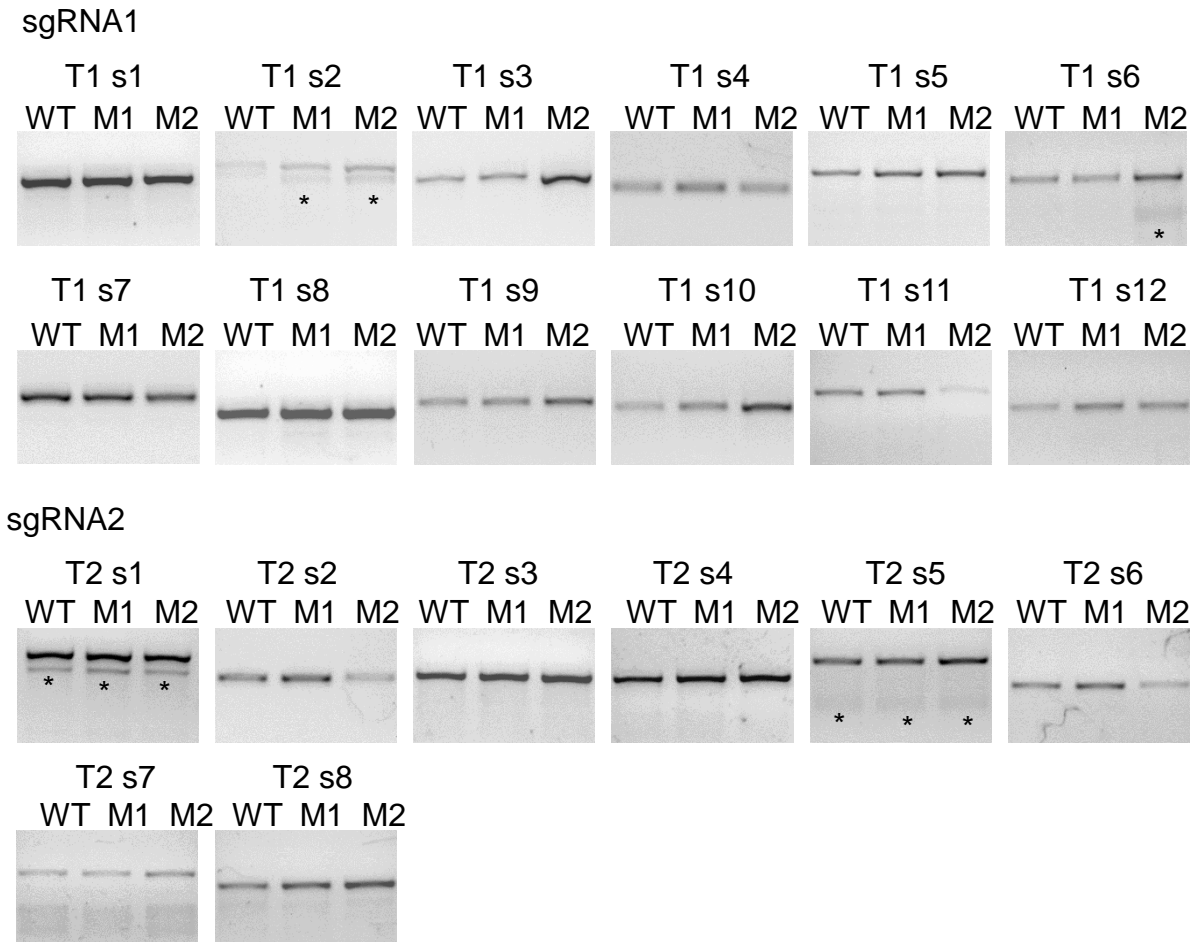

**Figure S1** Generation of *SHANK3* gene (NCBI Reference, NW\_012011200.1) mutant monkeys. **(A)** *SHANK3* gene structure and protein domain, and CRISPR/Cas9 sgRNA targeting sites. **(B)** Summary of three gene-edited offspring. **(C)** T7 endonuclease I (T7EN1) cleavage assay of PCR products amplified from brain tissues of *SHANK3*<sup>M1</sup> and *SHANK3*<sup>M2</sup>, and the umbilical cord of *SHANK3*<sup>M3</sup>. \* indicates samples with cleaved bands. M, DNA marker III; WT, wild-type brain tissues. **(D)** Mosaic analysis of various tissues of *SHANK3*<sup>M1</sup> and *SHANK3*<sup>M2</sup> by T7EN1 cleavage assay. \* indicates samples with cleaved bands. M, DNA marker III; WT, wild-type brain tissues. **(E)** DNA sequences of *SHANK3* mutations at site 2 in three offspring. *SHANK3*<sup>M1</sup> has a large deletion of 11 456 bp as a result of targeting both sites. **(F)** Deep amplicon sequencing of different tissues from three offspring. The reads number for each allele is presented. **(G)** Off-target analysis of two sgRNAs in WT, *SHANK3*<sup>M1</sup> and *SHANK3*<sup>M2</sup> brain tissues. Sequencing of the PCR products with cleavage (\*) did not reveal authentic mutations in any clone but showed polymorphism. \* denotes cleaved band.

**Figure S2**

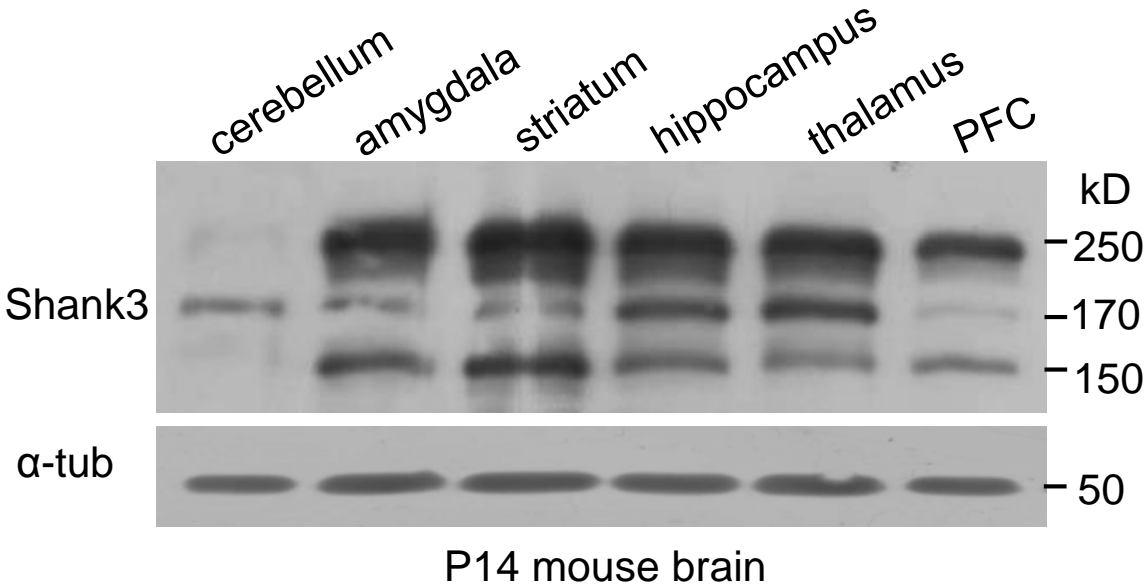

**Figure S2** Brain region specific expression profiles of Shank3 protein in different regions of P14 mouse brain. Shank3 is expressed at the highest level in the striatum.

## Figure S3

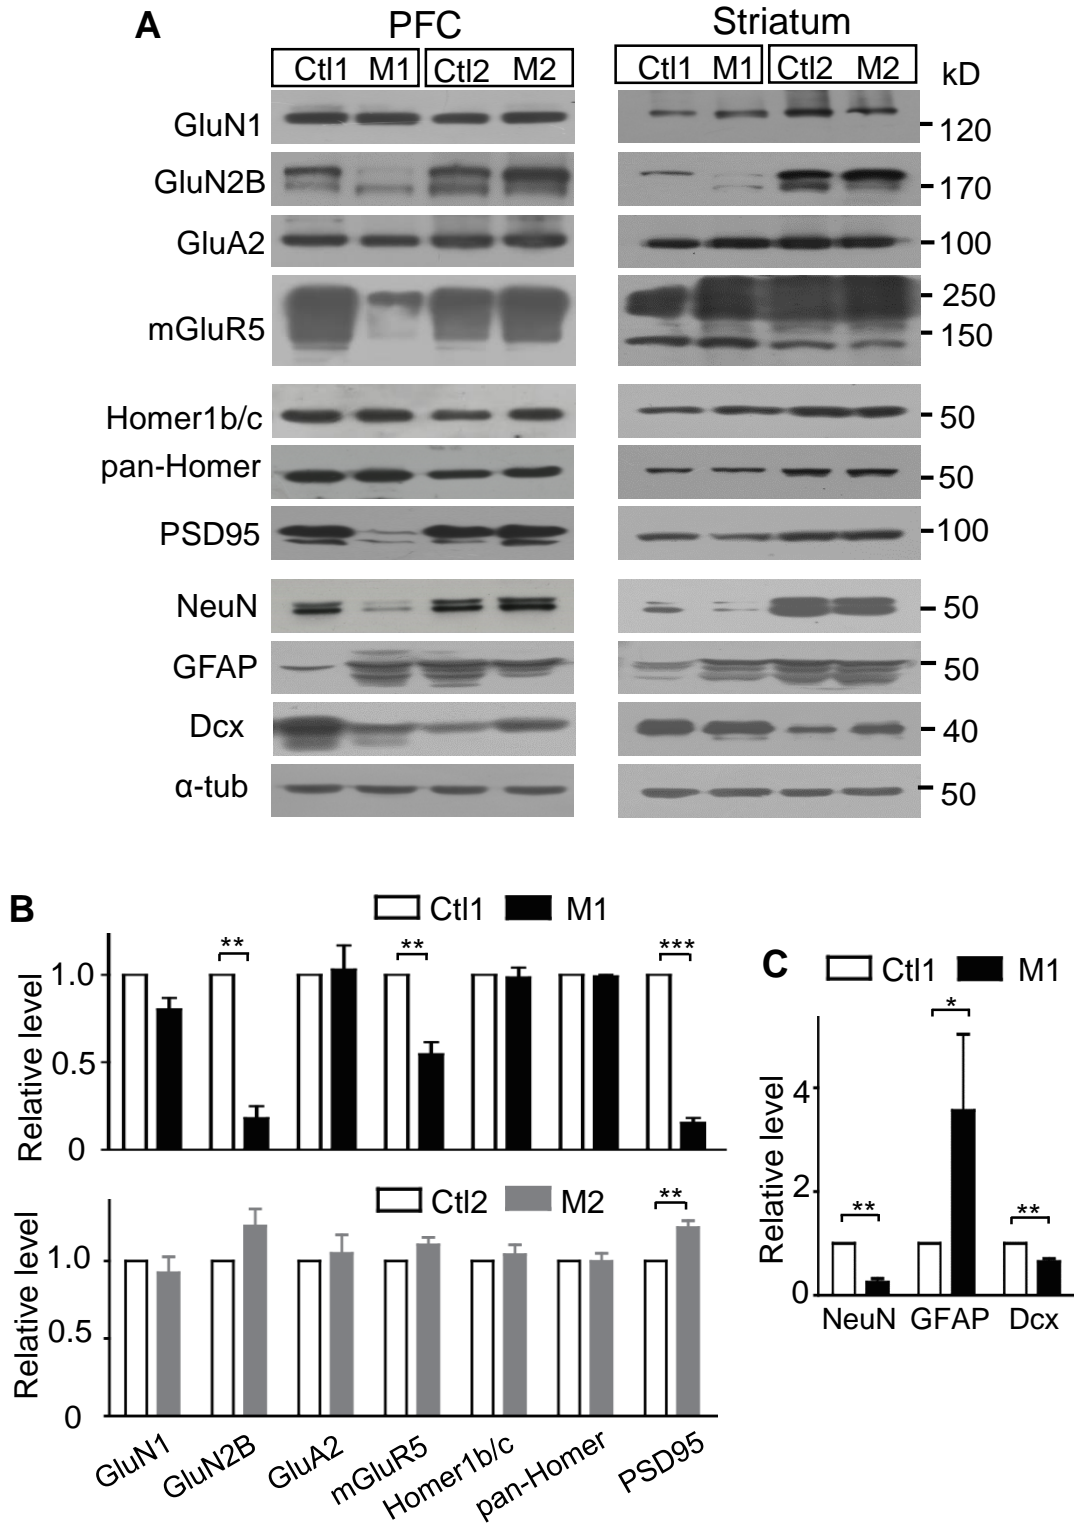

**Figure S3** Western analysis of postsynaptic proteins and neuronal cell markers. **(A)** Altered expression of postsynaptic proteins and neuron/glia markers in PFC and striatum of mutants. **(B)** Relative levels of receptors and postsynaptic proteins normalized to  $\alpha$ -tubulin in PFC of *SHANK3<sup>M1</sup>* and *SHANK3<sup>M2</sup>* fetuses. **(C)** Relative levels of NeuN, GFAP and DCX normalized to  $\alpha$ -tubulin in the PFC. Western blot analysis was repeated 3-6 times for each protein. Data are presented as mean  $\pm$  SEM. \* $P < 0.05$ , \*\* $P < 0.01$ , \*\*\* $P < 0.001$  by Student's t test.

## Figure S4

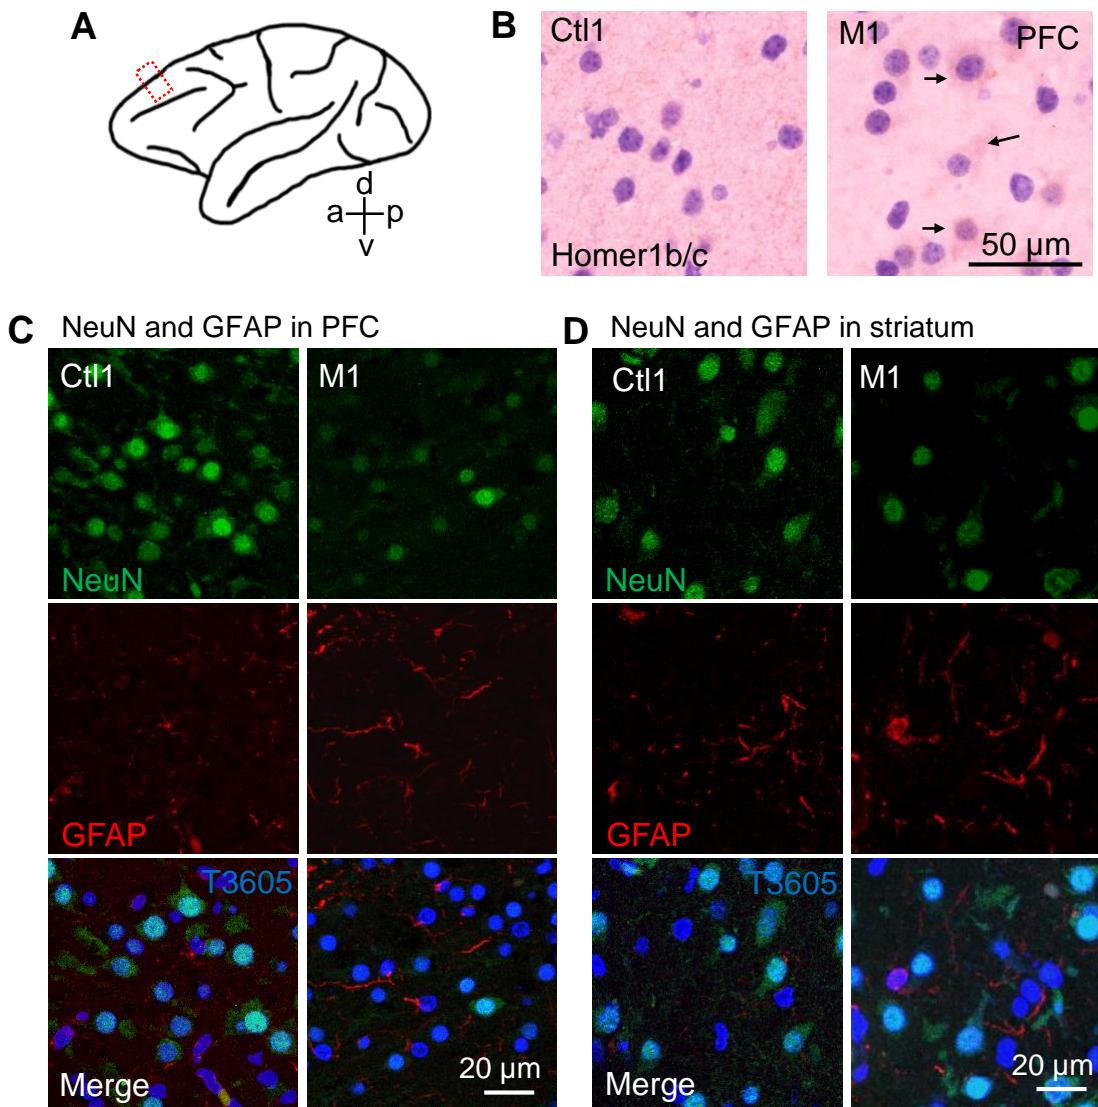

**Figure S4** Altered localization of Homer1b/c and expression levels of NeuN and GFAP in the PFC and striatum. **(A)** Diagram of the PFC region used for immunostaining analysis. **(B)** Homer1b/c staining (DAB, brown) in the PFC of Ctl1 and *SHANK3*<sup>M1</sup>. Nuclei were stained with hematoxylin (blue). Arrowheads point to accumulated Homer1b/c in the cytoplasm. Scale bar, 50  $\mu$ m. **(C, D)** Immunofluorescent staining of NeuN (green) and GFAP (red) in the PFC **(C)** and striatum **(D)**. Nuclei were stained with T3605 (blue). Scale bar, 20  $\mu$ m.

## Figure S5

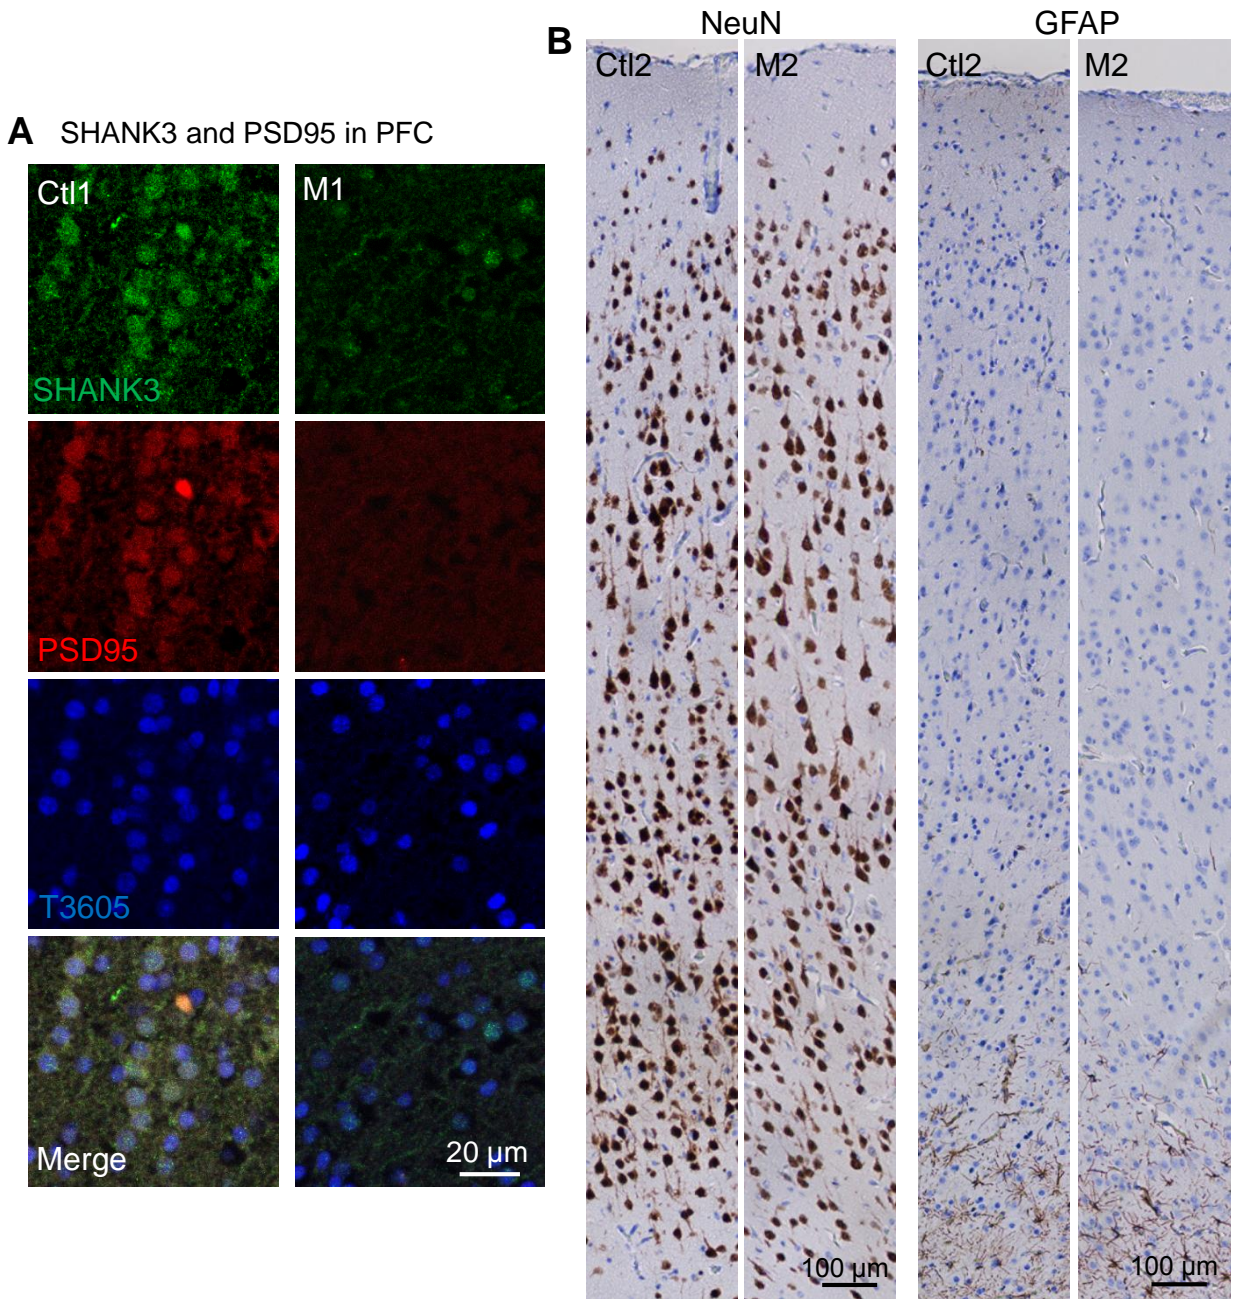

**Figure S5** Decreased SHANK3-PSD95 staining in *SHANK3<sup>M1</sup>* PFC and normal NeuN and GFAP staining in *SHANK3<sup>M2</sup>* PFC. **(A)** Immuno-staining of SHANK3 (green) and PSD95 (red) in PFC. Nuclei were stained with T3605 (blue). Scale bar, 20 µm. **(B)** NeuN and GFAP staining (brown) in layers I-VI of PFC. Nuclei were stained with hematoxylin (blue). Scale bar, 100 µm.



## Figure S6

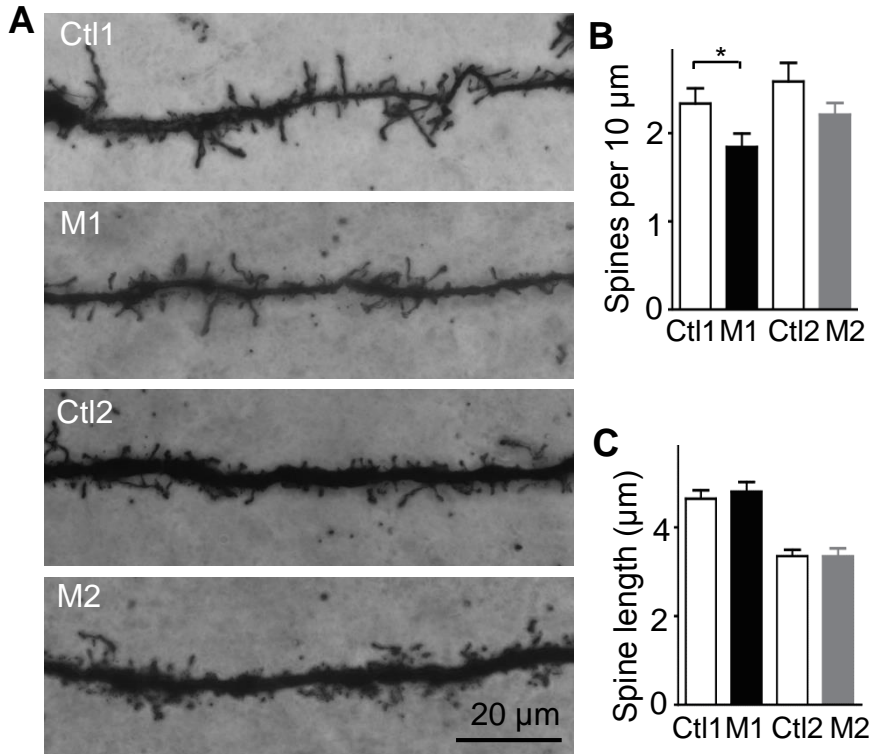

**Figure S6** Reduced density of dendritic spines in the PFC of *SHANK3*<sup>M1</sup> animal. **(A)** Representative images of Golgi impregnation analysis of the PFC of different animals. Scale bar, 20  $\mu\text{m}$ . Reduced spine density (number of spines/10  $\mu\text{m}$  dendrite) in the PFC of *SHANK3*<sup>M1</sup> **(B)** but normal length **(C)** of dendritic spines in the PFC of *SHANK3*<sup>M1</sup> and *SHANK3*<sup>M2</sup> brains.  $n = 10-15$  neurons/animal,  $*P < 0.05$ .
