# Supplementary material
Source: PubMed Central journal article supplement (PMC5630686)
Supplement: cr201795x3.pdf [file cr201795x3.pdf]

## Supplementary information, Tables S1 and S2

**Table S1** The off-target analysis and mosaic analysis of mutant offspring

### A. Potential off-targets of site 1

| NCBI Seq. ID         | Potential Off-target Seq.<br>(mismatch in red) | Primers                | Product size<br>(bp) and<br>code |
|----------------------|------------------------------------------------|------------------------|----------------------------------|
| NC_022277.1<br>chr6  | GGCAGCACTGACacT<br>CAcTGTGG                    | TGTCAGCATCAGAATTCCCCC  | 355<br>T1 s1                     |
|                      |                                                | CCAGGCAGACCCATGAAGAAT  |                                  |
| NC_022273.1<br>chr2  | aGcTgCACTGACGGTg<br>AGTGTGG                    | GGCACATAATGCAGGGACCA   | 794<br>T1 s2                     |
|                      |                                                | AACGGGTGAGTTGAGGCCAT   |                                  |
| NC_022284.1<br>chr13 | GGCAGtACTGAgGGT<br>CAcTGAGG                    | CCACTTGGGTGTACCTGGTT   | 462<br>T1 s3                     |
|                      |                                                | ATGTTcAGGAGTCAGGTTGGG  |                                  |
| NC_022276.1<br>chr5  | GGCAGCACTGAgtGT<br>CtGTGTGG                    | AGGTGTGGATGGTTCACTCA   | 177<br>T1 s4                     |
|                      |                                                | CCCCAGCCAGTGTTAATAGGG  |                                  |
| NC_022285.1<br>chr14 | GGCAGCACTGAatGcC<br>AGTGTGG                    | CTAGAGGCCTTTGGGGTGT    | 605<br>T1 s5                     |
|                      |                                                | CACCAGATGCCTCTTAGGGTC  |                                  |
| NC_022281.1<br>chr10 | GGCAGCACTGctGGg<br>CAGTGAGG                    | TACAGTGTCTGCATTGGCGG   | 517<br>T1 s6                     |
|                      |                                                | TTGACCCTGGTGTGGTTGAG   |                                  |
| NC_022281.1<br>chr10 | GGgAGCAgTGAaGGT<br>CAGTGAGG                    | GGGCACCATAGTAAGACCTC   | 404<br>T1 s7                     |
|                      |                                                | GAGCCACTGAAACTCCCTT    |                                  |
| NC_022290.1<br>chr19 | GGCAGCcCTGACTGTg<br>AGTGAGG                    | TGCCACTGCTAAGCTGACAT   | 284<br>T1 s8                     |
|                      |                                                | GGATGCTCGCTGCTGGTTAT   |                                  |
| NC_022280.1<br>chr9  | GGCAGtgCTGAaGGTC<br>AGTGAGG                    | TTCCTGCCTAAACACCCCAG   | 378<br>T1 s9                     |
|                      |                                                | GTCGAAGTCCTAACGAGGCA   |                                  |
| NC_022292.1<br>chrX  | GtCAGCAaTGgCGGTC<br>AGTGAGG                    | TGGAGGTAGTGTGGCTTG     | 456<br>T1 s10                    |
|                      |                                                | CTTACAGGGAAGTCTCAGGC   |                                  |
| NC_022276.1<br>chr5  | GGCAGCAgTGAaaGT<br>CAGTGGGG                    | ACTGACACACAAGGAATGGTAG | 263<br>T1 s11                    |
|                      |                                                | TGTAAGAGAAGGCTGAGTAGGA |                                  |
| NC_022280.1<br>chr9  | GGCAGCAaTGcCGGc<br>CAGTGTGG                    | CGCTGTACAATGTGGCATGG   | 316<br>T1 s12                    |
|                      |                                                | GATGTGCCAGGGCCTTTAGT   |                                  |

**B. Potential off-targets of site 2**

| NCBI Seq. ID         | Potential Off-target Seq.<br>(mismatch in red) | Primers                       | Product size<br>(bp) and<br>code |
|----------------------|------------------------------------------------|-------------------------------|----------------------------------|
| NC_022277.1<br>chr6  | GGCCACTGATGTgGta<br>CTCCAGG                    | CATCCCCTCTTCTCTAGCCC          | 434<br>T2 s1                     |
|                      |                                                | CCTAAGTAGCTCCGCCTGAAG         |                                  |
| NC_022279.1<br>chr8  | GGCCAgtcATgaTGCT<br>CTCCGGG                    | TCAGTGAGAGGGCTGTTAGC          | 398<br>T2 s2                     |
|                      |                                                | CTTTAGAGGACACCGTGGA           |                                  |
| NC_022273.1<br>chr2  | GGCCcCTGATGcTGC<br>TCTCaAGG                    | CTTGTGCCCTACGTTGCTTG          | 479<br>T2 s3                     |
|                      |                                                | CTTGTGCCCTACGTTGCTTG          |                                  |
| NC_022281.1<br>chr10 | GGCCACTGcTGTTGgc<br>CTCCTGG                    | GGACTTGCCCTTCACTCACC          | 787<br>T2 s4                     |
|                      |                                                | TCTGTGTGCTCCAGATGGGT          |                                  |
| NC_022290.1<br>chr10 | GGCCACTGcaGTTGT<br>CTCCTGG                     | TCCTTTGACTTGGGCTAACCA         | 399<br>T2 s5                     |
|                      |                                                | AGAAGTTGGAAGTCGGCAGAG         |                                  |
| NC_022288.1<br>chr17 | caCCACTGATGcTGCT<br>CTCCTGG                    | GACCATAGGTGTGCCTCTACA         | 323<br>T2 s6                     |
|                      |                                                | TGAAAGACGAGCCCAAGTT           |                                  |
| NC_022286.1<br>chr15 | aGCCACTGATGTTGC<br>TCctCAGG                    | CAATAAAGCAATCAGCCAGC          | 399<br>T2 s7                     |
|                      |                                                | CTAACACCCAAGCACCTCTT          |                                  |
| NC_022286.1<br>chr15 | GaCCtCTGATGTTGCT<br>CTgCAGG                    | TCTGGATGTGTAGTCTGGAAAA<br>GAG | 304<br>T2 s8                     |
|                      |                                                | TCCACCCTGTCCCCTACCAA          |                                  |

### C. Primers used in mosaic analysis

|                                    | sgRNA Targeted Sequence  | Primers                | Product size (bp) |
|------------------------------------|--------------------------|------------------------|-------------------|
| Target site 1                      | GGCAGCACTGAC<br>GGTCAGTG | GCTGCATAGCACGGACAAGGT  | 546<br>(305+241)  |
|                                    |                          | GGATCTCCTGCCAGCCATTCTC |                   |
| Target site 2                      | GGCCACTGATGTT<br>GCTCTCC | ACTCCTTTGGTTTGCCTGGAAG | 547<br>(361+186)  |
|                                    |                          | GAAGCCCTAGCCCATCACTACA |                   |
| Large deletion                     |                          | GCTGCATAGCACGGACAAGGT  |                   |
|                                    |                          | GAAGCCCTAGCCCATCACTACA |                   |
| Deep amplicon sequencing at site 2 | GGCCACTGATGTT<br>GCTCTCC | CTCCTCCTGGCTCAGGTCCA   | 222               |
|                                    |                          | AGCCAGCAGCTTCTCCTGGACC |                   |

### D. Barcodes used in deep amplicon sequencing

| Tissues  | Forward barcode | Reverse barcode | Offspring |
|----------|-----------------|-----------------|-----------|
| PFC      | TTAGGC          | TGACCA          | M1 and M2 |
| striatum | ATCACG          | CGATGT          | M1 and M2 |
| liver    | CAGATC          | ACTTGA          | M1 and M2 |
| kidney   | GATCAG          | TAGCTT          | M1 and M2 |
| gonad    | ATGTCA          | CCGTCC          | M1 and M2 |
| blood    | ATCACG          | CGATGT          | M3        |
| hair     | TTAGGC          | TGACCA          | M3        |
| placenta | CAGATC          | ACTTGA          | M3        |

**Table S2** Antibodies used for western and immunostaining analyses

| <b>Antibody</b>   | <b>Source</b> | <b>Cat. No.</b> | <b>Company</b> | <b>WB/IHC Dilution</b> |
|-------------------|---------------|-----------------|----------------|------------------------|
| Shank3            | Rabbit        |                 | This study     | WB 1:5000; IHC 1:5000  |
| $\alpha$ -tubulin | mouse         | T5168           | Sigma          | WB 1:25000             |
| GluN1             | Rabbit        | 5704S           | Cell Signaling | WB 1:1000              |
| GluN2B            | Rabbit        | 4212S           | Cell Signaling | WB 1:2000              |
| GluA2             | Rabbit        | ab133477        | Abcam          | WB 1:2000              |
| mGluR5            | Rabbit        | ab5675          | Millipore      | WB 1:2000              |
| Homer1b/c         | Rabbit        | sc-20807        | Santa Cruz     | WB 1:1000; IHC 1:400   |
| Homer             | Mouse         | sc-17842        | Santa Cruz     | WB 1:2000              |
| PSD95             | Mouse         | CP35            | Cal Biochem    | WB1:2000; IHC 1:200    |
| NeuN              | Mouse         | Ab104224        | Abcam          | WB 1:5000; IHC 1:1000  |
| GFAP              | Rabbit        | Z0334           | Dako           | WB 1:20000; IHC 1:5000 |
| Doublecortin      | Rabbit        | 4604            | Cell Signaling | WB 1:2000              |
